# Supplementary material
Source: bioRxiv or medRxiv preprint supplement (https://medrxiv.org/highwire/filestream/82045/field_highwire_adjunct_files/3/2020.05.18.20099960-4.pdf)

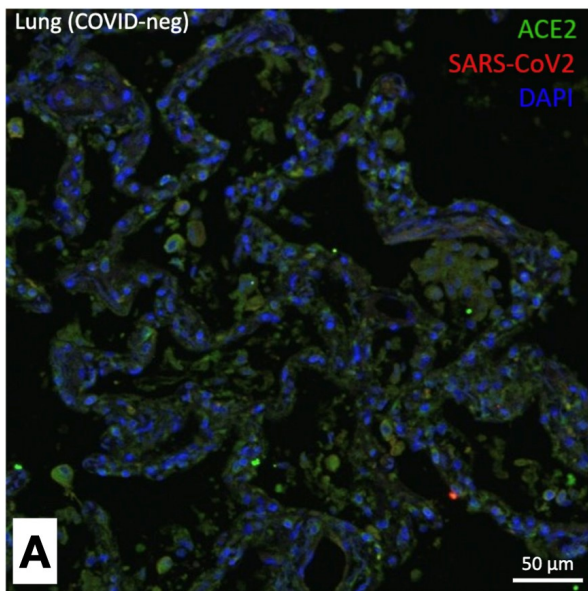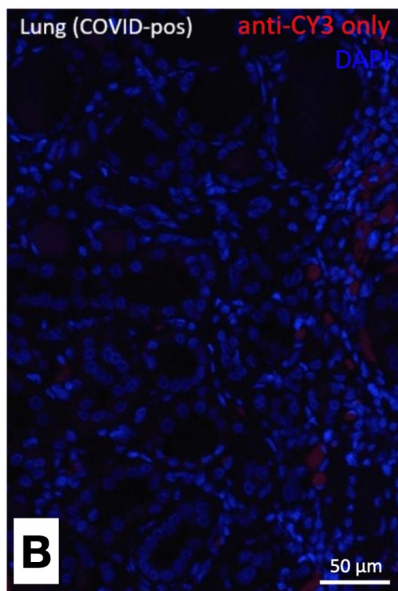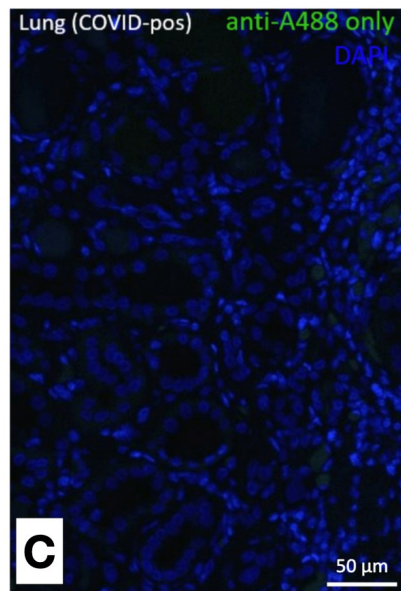

Supplement: Supplementary file [file 2020.05.18.20099960-4.pdf]
